# Supplementary material for: Obesity Is Less Frequently Associated with Cognitive Impairment in Elderly Individuals: A Cross-Sectional Study in Yogyakarta, Indonesia
Source: PubMed Central journal article supplement (PMC7071195; doi:10.3390/nu12020367), 2020-01-30
Supplement: nutrients-12-00367-s001.pdf [file nutrients-12-00367-s001.pdf]

Table S1. SES, cognitive impairment, and BMI assignments.

| Classification                                |                     |                                    |                                 |
|-----------------------------------------------|---------------------|------------------------------------|---------------------------------|
| 1. Body mass index (BMI) (kg/m <sup>2</sup> ) |                     |                                    |                                 |
| Score                                         |                     |                                    | Categories                      |
| <18.5                                         | -                   | -                                  | Underweight                     |
| 18.5–22.9                                     | -                   | -                                  | Normal                          |
| 23–27.4                                       | -                   | -                                  | Overweight                      |
| ≥27.5                                         | -                   | -                                  | Obese                           |
| 2. Socioeconomic status (SES)                 |                     |                                    |                                 |
| Personal Monthly Income<br>(IDR)              | Educational level   | Occupation                         | Score                           |
| <1.000.000                                    | Elementary school   | Laid-off workers                   | 1                               |
| 1.000.000–2.000.000                           | Junior high school  | Retirees                           | 2                               |
| 2.000.000–3.000.000                           | Senior high school  | Self-working/service<br>industries | 3                               |
| >3.000.000                                    | University or Above | Enterprise/Civil Servants          | 4                               |
| 3. Cognitive function                         |                     |                                    |                                 |
| MoCA–INA <sup>‡</sup>                         | GDS-SF <sup>‡</sup> | ADL or IADL <sup>‡</sup>           | Categories                      |
| >25                                           | ≤5                  | 0 or 0                             | Without cognitive<br>impairment |
| 19–25                                         | ≤5e                 | 0 or ≤2                            | Mild cognitive<br>impairment    |

<19

-

$\geq 1$  or  $> 2$

Severe cognitive  
impairment  
(dementia)

---

‡MOCA-INA = Montreal Cognitive Assessment-Indonesia version; GDS-SF = Geriatric

Depression Scale-Short Form; ADL = Activity of Daily Living; IADL = Instrumental

Activity of Daily Living
